# Supplementary material for: Inhaled Corticosteroids Alone and in Combination With Long-Acting β2 Receptor Agonists to Treat Reduced Lung Function in Preterm-Born Children: A Randomized Clinical Trial
Source: PubMed Central journal article supplement (PMC8669602; doi:10.1001/jamapediatrics.2021.5111), 2021-12-13
Supplement: jamapediatr-e215111-s003.pdf [file jamapediatr-e215111-s003.pdf]

## Data Sharing Statement

### Data

**Data available:** Yes

**Data types:** Other (please specify)

**Additional Information:** Data will be available after two years of publication due to data sharing agreements in place.

**How to access data:** Please contact corresponding author.

**When available:** beginning date: 08-01-2023, end date: 07-31-2025

### Supporting Documents

**Document types:** None

### Additional Information

**Who can access the data:** Anyone requesting the data.

**Types of analyses:** For specific question to be addressed.

**Mechanisms of data availability:** After signed data access agreement.

**Any additional restrictions:** Only anonymised data can be made available.
